# Supplementary material for: Deep Learning Reconstruction for 40-keV Virtual Monoenergetic CT of Colon Cancer: Evaluation of Image Quality and Edge Sharpness
Source: Research Square preprint supplement (doi:10.21203/rs.3.rs-8621121/v1), 2026-01-21
Supplement: Supplementary file 1 [file c3acfb689aee26b5a0635d96.xlsx]

## Sheet: Sheet1
					Score	Overall Quality	Image Noise	Lesion Contrast	Boundary Definition
					1 (Poor)	Non-diagnostic	Severe; assessment impossible	Very poor; unidentifiable	Unidentifiable; lost demarcation
					2 (Fair)	Suboptimal; low confidence	Noticeable; interferes with evaluation	Poor; hampers evaluation	Blurry; poorly defined margins
					3 (Moderate)	Acceptable; meets basic needs	Moderate; mildly affects assessment	Average; subtle effect	Moderate; some unclear segments
					4 (Good)	Good; sufficient for diagnosis	Minimal; no interference	Good; confident evaluation	Mostly clear; well-defined margins
					5 (Excellent)	Excellent; optimal texture	None; optimal appearance	Optimal; excellent conspicuity	Distinct; sharp demarcation
